# Supplementary material
Source: MDPI journal article supplement (https://www.mdpi.com/2073-4344/13/4/720)
Supplement: s1 [file s1]

# Supplementary Materials

## General Information

$^1\text{H}$ ,  $^{13}\text{C}$ , and  $^{31}\text{P}$  NMR spectra were recorded on a 400.13, 100.61, and 161.98 MHz instrument, respectively, equipped with an inverse gradient 5 mm probe in  $\text{CDCl}_3$  or DMSO. The  $^1\text{H}$  NMR chemical shifts are expressed with respect to residual protonated  $\text{CDCl}_3$  (7.27 ppm), which served as an internal standard. The  $^{13}\text{C}$  NMR shifts are expressed with respect to the  $\text{CDCl}_3$  (77.0 ppm). The 85%  $\text{H}_3\text{PO}_4/\text{D}_2\text{O}$  was used as external standard for  $^{31}\text{P}$  NMR. The assignment of signals in the  $^1\text{H}$  NMR spectrum was made using 2D COSY and NOESY experiments. Resonance signals of carbon atoms were assigned based on 2D  $^1\text{H}$ - $^{13}\text{C}$  HSQC and  $^1\text{H}$ - $^{13}\text{C}$  HMBC experiments. Coupling constants ( $J$ ) were measured from one-dimensional spectra, and multiplicities were abbreviated as follows: s (singlet), d (doublet), dd (doublet of doublets), t (triplet), and m (multiplet). IR spectra were recorded on a two-beam Bruker Vertex 70 spectrometer, in a microlayer from chloroform. The C, H microanalyses were performed on a Flash EA 1112 SHNS-O/MAS analyzer. Melting points were established using a Kofler micro hot-stage apparatus (Wagner & Munz GmbH, Germany). Commercially available red phosphorus (KSAN Sia, China) was purified by consecutive washing with aq. NaOH (1-2%),  $\text{H}_2\text{O}$ , EtOH, and Et $_2\text{O}$  to remove all acidic impurities, dried in vacuum at 25-30 °C to constant weight and stored under inert atmosphere ( $\text{N}_2$ ). Usual commercial toluene, KOH·0.5 $\text{H}_2\text{O}$  (~15% water), catalysts and arylmethyl halogenides were used without further purification. The 4-Methoxybenzylchloride, 3-acylbenzylchloride, and 2-thienylmethylchloride were prepared according to the reported procedures [1-3], correspondingly. All reagents were commercially available.

## Experimental Procedures, Spectral and Analytical data

### *Benzyl-H-phosphinic acid (2a)*

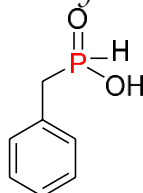

A mixture of  $\text{P}_{\text{red}}$  (3.10 g, 0.1 mol), KOH·0.5 $\text{H}_2\text{O}$  (20.00 g),  $\text{H}_2\text{O}$  (10.9 mL), Triton-X-100 (0.31 g), and (1-chloromethyl)benzene (**1a**, 2.50 g, 20 mmol) in 60 mL of toluene was stirred (700-800 rpm) at 90-95 °C for 3 h under argon atmosphere. The reaction mixture was cooled to r.t., diluted in two times with water, the aqueous alkaline fraction was thoroughly separated, washed by DCM (3×10 mL), acidified with hydrochloric acid (35%) to pH 2–3, extracted with chloroform (3×30 mL), dried with  $\text{Na}_2\text{SO}_4$ , and the solvent was distilled off. The residue was dried in vacuum to give **2a** (2.02 g, 65%) as pale yellow oil.

IR (film): 3085, 3062, 3030, 3007, 2912, 2850, 2630, 2368, 2189, 1960, 1880, 1659, 1601, 1496, 1454, 1401, 1240, 1200, 1170, 1124, 1070, 986, 821, 779, 720, 698, 598, 481, 443  $\text{cm}^{-1}$ .

$^1\text{H}$  NMR (400.13 MHz,  $\text{CDCl}_3$ ): 3.12 (d,  $^2J_{\text{PH}} = 18.7$  Hz, 2H,  $\text{PCH}_2$ ), 6.94 (d,  $^1J_{\text{PH}} = 560.3$  Hz, 1H, PH), 7.22-7.24 (m, 2H  $\text{H}_o$  from Ph), 7.27-7.28 (m, 1H,  $\text{H}_p$  from Ph), 7.30-7.34 (m, 2H  $\text{H}_m$  from Ph), 12.69 (brs, 1H, OH) ppm.

$^{13}\text{C}$  NMR (100.62 MHz,  $\text{CDCl}_3$ ): 36.97 (d,  $^1J_{\text{PC}} = 88.7$  Hz,  $\text{PCH}_2$ ), 127.01 (d,  $^5J_{\text{PC}} = 3.8$  Hz,  $\text{C}_p$  from Ph), 129.68 (d,  $^3J_{\text{PC}} = 6.3$  Hz,  $\text{C}_o$  from Ph), 128.65 (d,  $^4J_{\text{PC}} = 3.2$  Hz,  $\text{C}_m$  from Ph), 129.90 (d,  $^3J_{\text{PC}} = 6.0$  Hz,  $\text{C}_i$  from Ph) ppm.

$^{31}\text{P}$  NMR (161.98 MHz,  $\text{CDCl}_3$ ): 34.25 (d,  $^1J_{\text{PH}} = 558.9$  Hz) ppm.

Elemental analysis for  $\text{C}_7\text{H}_9\text{O}_2\text{P}$  (156.12): calcd. C, 53.85; H, 5.81; found: C, 53.82; H, 5.80.

### 1-Phenylethyl-H-phosphinic acid (**2b**).

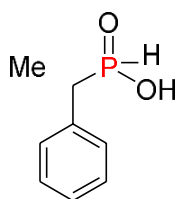

A mixture of  $P_{red}$  (3.10 g, 0.1 mol), KOH·0.5H<sub>2</sub>O (20.00 g), H<sub>2</sub>O (4.5 mL), Triton- X-100 (0.63 g), and (1-chloroethyl)benzene (**1c**) (1.4 g, 10 mmol) in 40 mL of toluene was stirred (700-800 rpm) at 82-85 °C for 3 h under argon atmosphere. The reaction mixture was cooled to r.t., diluted in two times with water, the aqueous alkaline fraction was thoroughly separated, washed by DCM (3×10 mL), acidified with hydrochloric acid to pH 2–3, extracted with chloroform (3×30 mL), dried with Na<sub>2</sub>SO<sub>4</sub>, the solvent was distilled off, and the residue was dried in vacuum to give **2b** (0.83 g, 49%) as a pale yellow oil.

IR (film): 3061, 3030, 2974, 2932, 2878, 2852, 2365, 2164, 1959, 1716, 1704, 1651, 1602, 1562, 1543, 1494, 1455, 1378, 1340, 1317, 1227, 1194, 1168, 1064, 967, 794, 766, 699, 602, 506 cm<sup>-1</sup>.

<sup>1</sup>H NMR (400.13 MHz, CDCl<sub>3</sub>): 1.53 (dd, <sup>3</sup>J<sub>HH</sub> = 7.4 Hz, <sup>3</sup>J<sub>PH</sub> = 18.9 Hz, 3H, CH<sub>3</sub>CH), 3.07 (dq, <sup>3</sup>J<sub>HH</sub> = 7.4 Hz, <sup>2</sup>J<sub>PH</sub> = 17.5 Hz, 1H, PCH), 6.80 (d, <sup>1</sup>J<sub>PH</sub> = 552.8 Hz, 1H, PH), 7.24-7.27 (m, 3H H<sub>o,p</sub> from Ph), 7.31-7.35 (m, 2H, H<sub>m</sub> from Ph), 11.22 (brs, 1H, OH) ppm.

<sup>13</sup>C NMR (100.62 MHz, CDCl<sub>3</sub>): 12.33 (d, <sup>2</sup>J<sub>PC</sub> = 2.0 Hz, CH<sub>3</sub>), 40.50 (d, <sup>1</sup>J<sub>PC</sub> = 89.3 Hz, PCH), 127.38 (d, <sup>5</sup>J<sub>PC</sub> = 3.4 Hz, C<sub>p</sub> from Ph), 128.63 (d, <sup>3</sup>J<sub>PC</sub> = 6.3 Hz, C<sub>o</sub> from Ph), 128.73 (d, <sup>4</sup>J<sub>PC</sub> = 2.8 Hz, C<sub>m</sub> from Ph), 135.91 (d, <sup>2</sup>J<sub>PC</sub> = 5.0 Hz, C<sub>i</sub> from Ph) ppm.

<sup>31</sup>P NMR (161.98 MHz, CDCl<sub>3</sub>): 41.42 (d, <sup>1</sup>J<sub>PH</sub> = 552.6 Hz) ppm.

Elemental analysis for C<sub>8</sub>H<sub>11</sub>O<sub>2</sub>P (170.15): calcd. C, 56.47; H, 6.52; found: C, 56.43; H, 6.51.

### 1-Naphthylmethyl-H-phosphinic acid (**2c**)

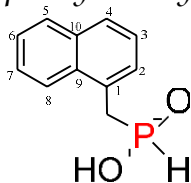

A mixture of  $P_{red}$  (3.10 g, 0.1 mol), KOH·0.5H<sub>2</sub>O (20.00 g), H<sub>2</sub>O (10.9 mL), Triton-X-100 (0.31 g), and (1-chloromethyl)naphthalene (**1d**) (0.88 g, 5 mmol) in 40 mL of toluene was stirred (700-800 rpm) at 82-85 °C for 3 h under argon atmosphere. The reaction mixture was cooled to r.t., diluted in two times with water, the aqueous alkaline fraction was thoroughly separated, washed by DCM (3×10 mL), acidified with hydrochloric acid to pH 4–5, extracted with chloroform (3×30 mL), and dried with Na<sub>2</sub>SO<sub>4</sub>. The solvent was distilled off and the residue was dried in a vacuum to give **2c** (0.52 g, 50%) as light beige powder, mp 117-119 °C.

IR (KBr): 3444, 3045, 3013, 2952, 2917, 2851, 2628, 2370, 2308, 2158, 1685, 1595, 1510, 1396, 1350, 1270, 1255, 1238, 1130, 1018, 979, 960, 798, 775, 590, 445 cm<sup>-1</sup>.

<sup>1</sup>H NMR (400.13 MHz, DMSO-d<sub>6</sub>): 3.60 (d, <sup>2</sup>J<sub>PH</sub> = 18.8 Hz, 2H, PCH<sub>2</sub>), 7.02 (d, <sup>1</sup>J<sub>PH</sub> = 532.1 Hz, 1H, PH), 7.45-7.48 (m, 2H, H-2,6 from Naph), 7.51-7.57 (m, 2H, H-3,7 from Naph), 7.83 (d, <sup>3</sup>J<sub>HH</sub> = 7.6 Hz, 1H, H-5 from Naph), 7.92 (d, <sup>3</sup>J<sub>HH</sub> = 7.6 Hz, 1H, H-4 from Naph), 8.13 (d, <sup>3</sup>J<sub>HH</sub> = 7.8 Hz, 1H, H-8 from Naph) ppm.

<sup>13</sup>C NMR (100.62 MHz, DMSO-d<sub>6</sub>): 35.06 (d, <sup>1</sup>J<sub>PC</sub> = 85.7 Hz, PCH<sub>2</sub>), 124.69 (C-8), 125.59 (d, <sup>6</sup>J<sub>PC</sub> = 3.1 Hz, C-6), 125.81 (C-3), 126.06 (C-7), 127.13 (d, <sup>5</sup>J<sub>PC</sub> = 3.1 Hz, C-5), 128.16 (d, <sup>3</sup>J<sub>PC</sub> = 7.2 Hz, C-2), 128.41 (C-4), 128.76 (d, <sup>3</sup>J<sub>PC</sub> = 7.9 Hz, C-9), 131.91 (d, <sup>2</sup>J<sub>PC</sub> = 4.0 Hz, C-1), 133.54 (C-10) ppm.

<sup>31</sup>P NMR (161.98 MHz, DMSO-d<sub>6</sub>): 28.10 (d, <sup>1</sup>J<sub>PH</sub> = 534.0 Hz) ppm.

Elemental analysis for C<sub>11</sub>H<sub>11</sub>O<sub>2</sub>P (206.18): calcd. C, 64.08; H, 5.38; found: C, 64.04; H, 5.37.

### 3-Bromobenzyl-*H*-phosphinic acid (**2d**)

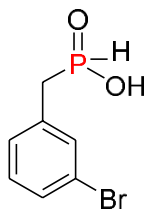

A mixture of  $P_{red}$  (3.10 g, 0.1 mol),  $KOH \cdot 0.5 H_2O$  (20.00 g),  $H_2O$  (10.9 mL), Triton-X-100 (0.63 g), and 1-bromo-3-(bromomethyl)benzene (**1e**) (2.50 g, 10 mmol) in 40 mL of toluene was stirred (700-800 rpm) at 75 °C for 3 h under argon atmosphere. The reaction mixture was cooled to r.t., diluted in two times with water, the aqueous alkaline fraction was thoroughly separated, washed by DCM (3×10 mL), acidified with hydrochloric acid to pH 4–5, extracted with chloroform (3×30 mL) and dried with  $Na_2SO_4$ . The solvent was distilled off and the residue was dried in avacuum, obtaining **2d** (0.82 g, 35%) of light beige powder, mp 105-107 °C.

IR (KBr): 3442, 3057, 2954, 2907, 2648, 2366, 2260, 2144, 1868, 1659, 1597, 1569, 1473, 1426, 1402, 1256, 1209, 1183, 1134, 1102, 1074, 999, 983, 966, 892, 853, 816, 786, 689, 668, 518, 449  $cm^{-1}$ .

$^1H$  NMR (400.13 MHz,  $CDCl_3$ ): 3.09 (d,  $^2J_{PH} = 18.3$  Hz, 2H,  $PCH_2$ ), 6.98 (d,  $^1J_{PH} = 563.9$  Hz, 1H, PH), 7.16-7.20 (m, 1H, H-6 from  $C_6H_4$ ), 7.21 (t,  $^3J_{5,6} \sim ^3J_{5,4} = 7.6$  Hz, 1H, H-5 from  $C_6H_4$ ), 7.40-7.42 (m, 2H, H-2,4 from  $C_6H_4$ ), 10.99 (brs, 1H, OH) ppm.

$^{13}C$  NMR (100.62 MHz,  $CDCl_3$ ): 37.04 (d,  $^1J_{PC} = 88.2$  Hz,  $PCH_2$ ), 122.81 (d,  $^4J_{PC} = 4.2$  Hz, C-3), 128.54 (d,  $^3J_{PC} = 6.2$  Hz, C-6), 130.36 (d,  $^4J_{PC} = 3.3$  Hz, C-5), 130.48 (t,  $^5J_{PC} = 3.7$  Hz, C-4), 131.91 (d,  $^2J_{PC} = 7.3$  Hz, C-1), 132.75 (d,  $^3J_{PC} = 6.4$  Hz, C-2) ppm.

$^{31}P$  NMR (161.98 MHz,  $CDCl_3$ ): 34.96 (d,  $^1J_{PH} = 566.4$  Hz) ppm.

Elemental analysis for  $C_7H_8BrO_2P$  (235.02): calcd. C, 35.77; H, 3.43. found: C, 35.72; H, 3.41.

### (4-fluorobenzyl)phosphinic acid (**2e**)

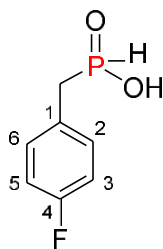

A mixture of  $P_{red}$  (3.10 g, 0.1 mol), KOH·0.5H<sub>2</sub>O (20.00 g), H<sub>2</sub>O (13 mL), Triton- X-100 (0.63 g), and 1-(chloromethyl)-4-fluorobenzene (**1f**) (1.44 g, 10 mmol) in 40 mL of toluene was stirred (700-800 rpm) at 75 °C for 3 h under argon atmosphere. The reaction mixture was cooled to r.t., diluted in two times with water, the aqueous alkaline fraction was thoroughly separated, washed by DCM (3×10 mL), acidified with hydrochloric acid to pH 4–5, extracted with chloroform (3×30 mL), dried with Na<sub>2</sub>SO<sub>4</sub>, the solvent was distilled off, and the residue was dried in a vacuum, obtaining **2e** (0.54 g, 31%) of light beige powder, mp 75-76 °C.

IR (KBr): 3426, 3051, 2903, 2661, 2624, 2421, 2283, 2166, 2044, 1900, 1684, 1605, 1512, 1418, 1399, 1309, 1260, 1228, 1207, 1183, 1159, 1127, 1089, 983, 839, 763, 748, 696, 534, 493, 449 cm<sup>-1</sup>.

<sup>1</sup>H NMR (400.13 MHz, CDCl<sub>3</sub>): 3.09 (d, <sup>2</sup>J<sub>PH</sub> = 18.1 Hz, 2H, PCH<sub>2</sub>), 6.94 (d, <sup>1</sup>J<sub>PH</sub> = 560.2 Hz, 1H, PH), 7.01 (t, <sup>3</sup>J<sub>HH</sub> ~ <sup>3</sup>J<sub>HF</sub> = 8.5 Hz, 2H, H-3,5 from C<sub>6</sub>H<sub>4</sub>), 7.19-7.26 (m, 2H, H-2,6 from C<sub>6</sub>H<sub>4</sub>), 12.53 (brs, 1H, OH) ppm.

<sup>13</sup>C NMR (100.62 MHz, CDCl<sub>3</sub>): 36.39 (d, <sup>1</sup>J<sub>PC</sub> = 89.1 Hz, PCH<sub>2</sub>), 115.72 (d, <sup>2</sup>J<sub>FC</sub> = 22.1 Hz, C-3,5), 125.38 (d, <sup>2</sup>J<sub>PC</sub> ~ <sup>4</sup>J<sub>FC</sub> = 4.3 Hz, C-1), 131.32 (d, <sup>3</sup>J<sub>PC</sub> ~ <sup>3</sup>J<sub>FC</sub> = 7.0 Hz, C-2,6), 162.08 (d, <sup>1</sup>J<sub>FC</sub> = 246.4 Hz, C-4) ppm.

<sup>31</sup>P NMR (161.98 MHz, CDCl<sub>3</sub>): 34.18 (dt, <sup>1</sup>J<sub>PH</sub> = 560.4 Hz, <sup>2</sup>J<sub>PH</sub> = 18.0 Hz) ppm

<sup>19</sup>F NMR (376.5 MHz, CDCl<sub>3</sub>): δ -114.9 ppm.

Elemental analysis for C<sub>7</sub>H<sub>8</sub>FO<sub>2</sub>P (174.11): calcd. C, 48.29; H, 4.63; found: C, 48.26; H, 4.62.

### 4-Methoxybenzyl-H-phosphinic acid (**2f**)

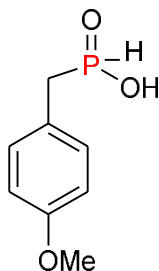

To a mixture of  $P_{red}$  (1.03 g, 0.03 mol), KOH·0.5H<sub>2</sub>O (9.16 g), H<sub>2</sub>O (5 mL), Triton-X-100 (0.21 g), toluene (15 mL), and 1-(chloromethyl)-4-methoxybenzene (1.04 g, 6.67 mmol) in 5 mL of toluene was added dropwise (40 min) and stirred (700- 800 rpm) at 90-95 °C for 3 h. The reaction mixture was cooled to r.t., diluted in two times with water, the aqueous alkaline fraction was thoroughly separated, washed by DCM (3×5 mL), acidified with hydrochloric acid to pH 4–5, extracted with chloroform (3×20 mL), dried with Na<sub>2</sub>SO<sub>4</sub>, the solvent was distilled off, and the residue was dried in a vacuum, obtaining the (4-methoxybenzyl)-H-phosphinic acid (0.12 g, 10%) as white powder, mp 78-80 °C;

<sup>1</sup>H NMR (400.13 MHz, CDCl<sub>3</sub>): 2.92 (m, 2H, CH<sub>2</sub>P), 3.68 (s, 3H, OMe), 6.76-7.09 (4H, C<sub>6</sub>H<sub>4</sub>), 7.27 (d, <sup>1</sup>J<sub>PH</sub> = 564 Hz, 1H, PH).

<sup>31</sup>P NMR (161.98 MHz, CDCl<sub>3</sub>): 35.1 (d, <sup>1</sup>J<sub>PH</sub> = 564 Hz) ppm.

Elemental analysis for C<sub>8</sub>H<sub>11</sub>O<sub>3</sub>P (186.15): calcd. C, 51.62; H, 5.96; found: C, 50.28; H, 6.10.

This is a known compound: see J.-L. Montchamp and Y. R. Dumond, J. Am. Chem. Soc., 2001, 123, 3, 510-511.

## 2-Thienylmethyl-*H*-phosphinic acid

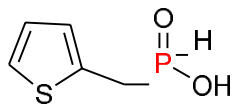

A mixture of  $P_{\text{red}}$  (3.1 g, 0.1 mol),  $\text{KOH} \cdot 0.5\text{H}_2\text{O}$  (20 g),  $\text{H}_2\text{O}$  (10.9 mL), Triton-X- 100 (0.63 g), and 2-(chloromethyl)thiophene (1.3 g, 0.01 mol) in 40 mL of toluene was stirred at 82-83 °C for 3 h. The reaction mixture was cooled to r.t., diluted in two times with water, the aqueous alkaline fraction was separated, acidified with hydrochloric acid to pH 4–5, extracted with chloroform (3×30 mL), dried with  $\text{Na}_2\text{SO}_4$ , the solvent was distilled off, and the residue was dried in a vacuum to give 2- thienylmethyl-*H*-phosphinic acid (0.10 g, 6%) as slightly yellow oil. From toluene phase, tris(2-thienylmethyl)phosphine oxide (0.45 g, 40%) was isolated as pale yellow oil.

$^1\text{H}$  NMR (400.13 MHz,  $\text{CDCl}_3$ ): 3.22 (d,  $^2J_{\text{PH}} = 16.0$  Hz, 2H,  $\text{PCH}_2$ ), 6.91-7.26 (m, 3H from thiophene), 6.88 (d, 1H,  $^1J_{\text{PH}} = 563$  Hz, PH), 12.46 (m, 1H, OH) ppm.

$^{31}\text{P}$  NMR (161.98 MHz,  $\text{CDCl}_3$ ): 33.3 ppm (d, 1H,  $^1J_{\text{PH}} = 560$  Hz, PH).

Elemental analysis for  $\text{C}_5\text{H}_7\text{O}_2\text{PS}$  (162.14): calcd. C, 37.04; H, 4.35; found: C, 37.01; H, 4.39

# Copies of NMR Spectra

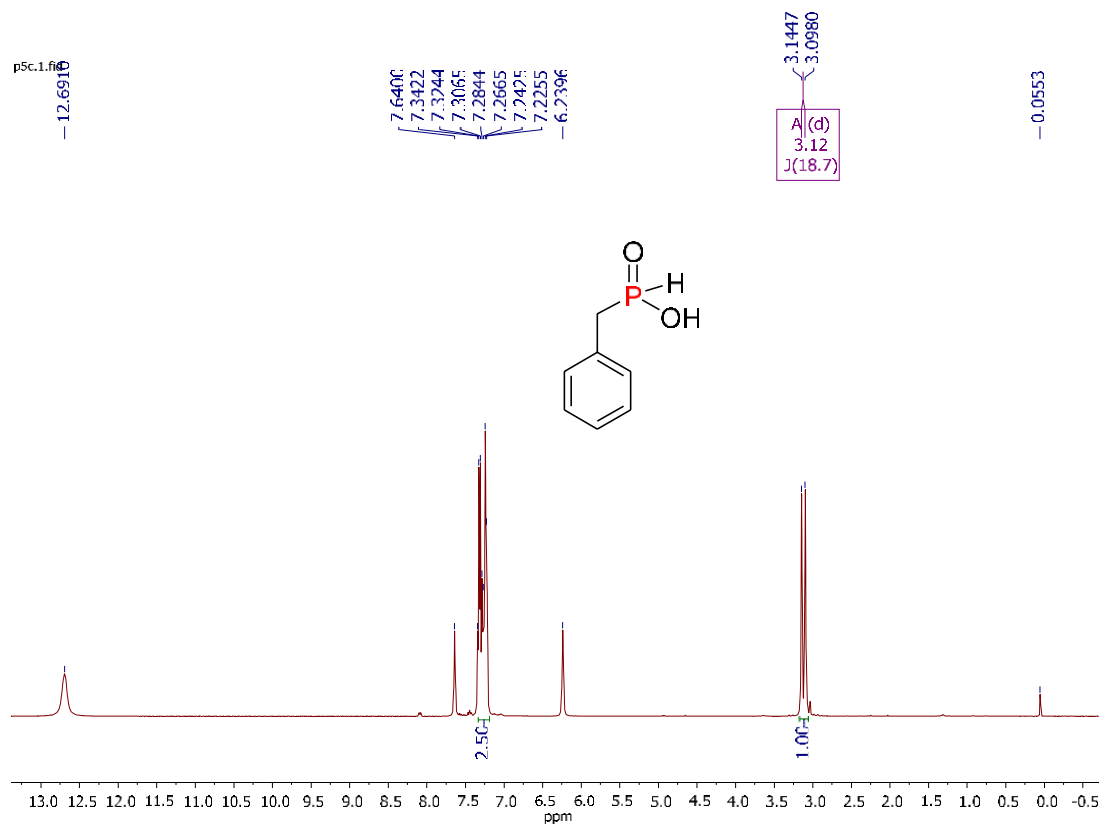

<sup>1</sup>H NMR spectrum of compound **2a** (400.13 MHz, CDCl<sub>3</sub>)

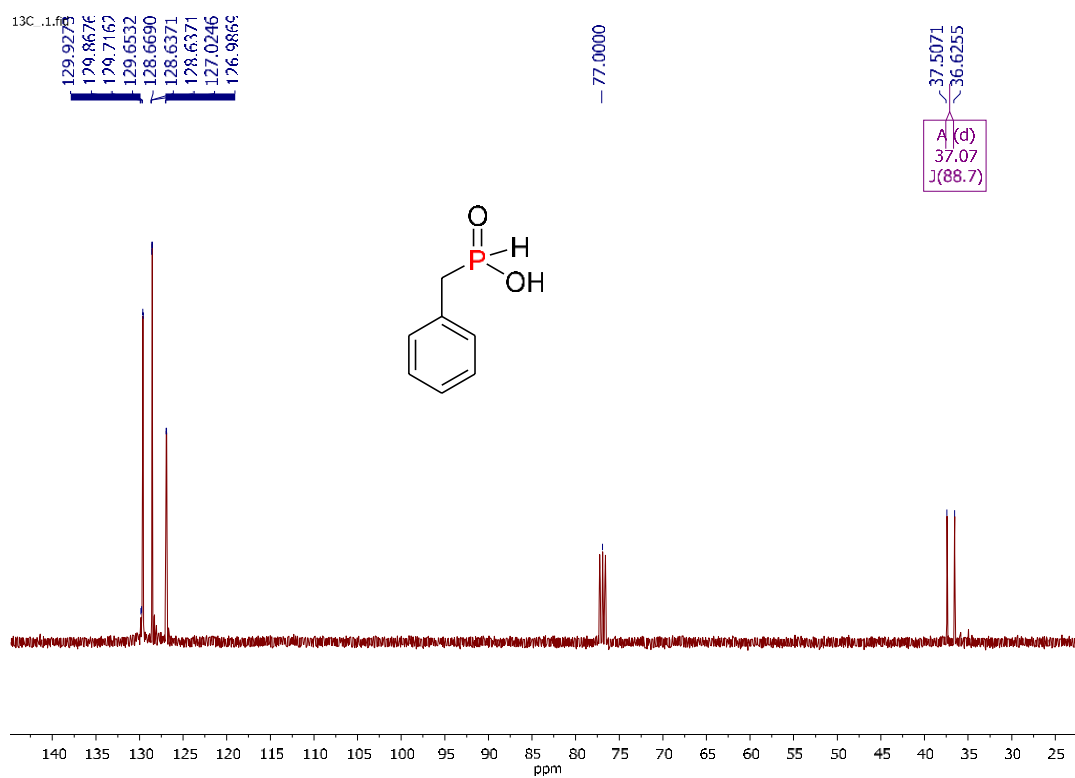

<sup>13</sup>C NMR spectrum of compound **2a** (100.62 MHz, CDCl<sub>3</sub>)

31Pcop.1.fid

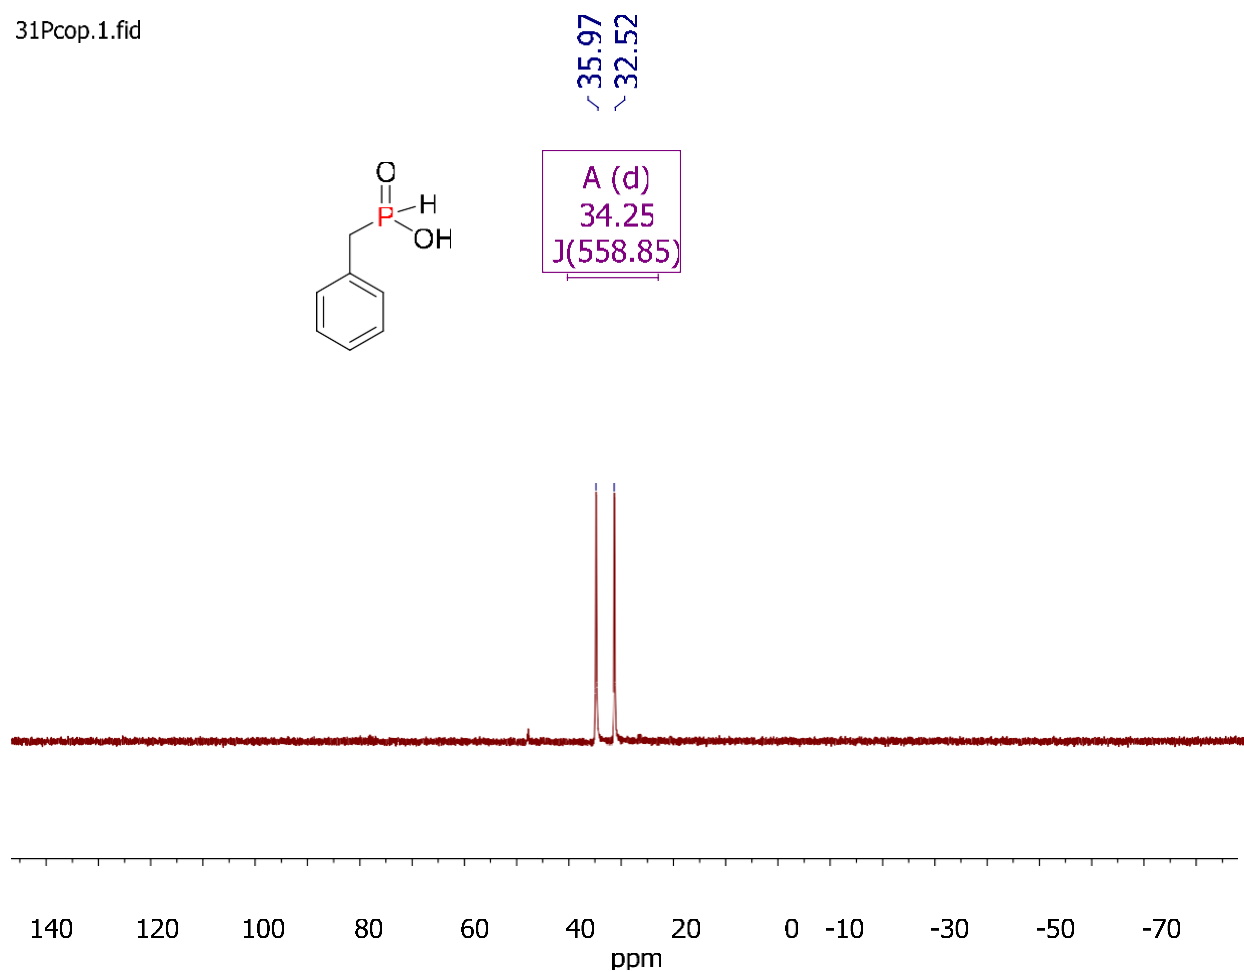

$^{31}\text{P}$  NMR spectrum of compound 2a (161.98 MHz,  $\text{CDCl}_3$ )

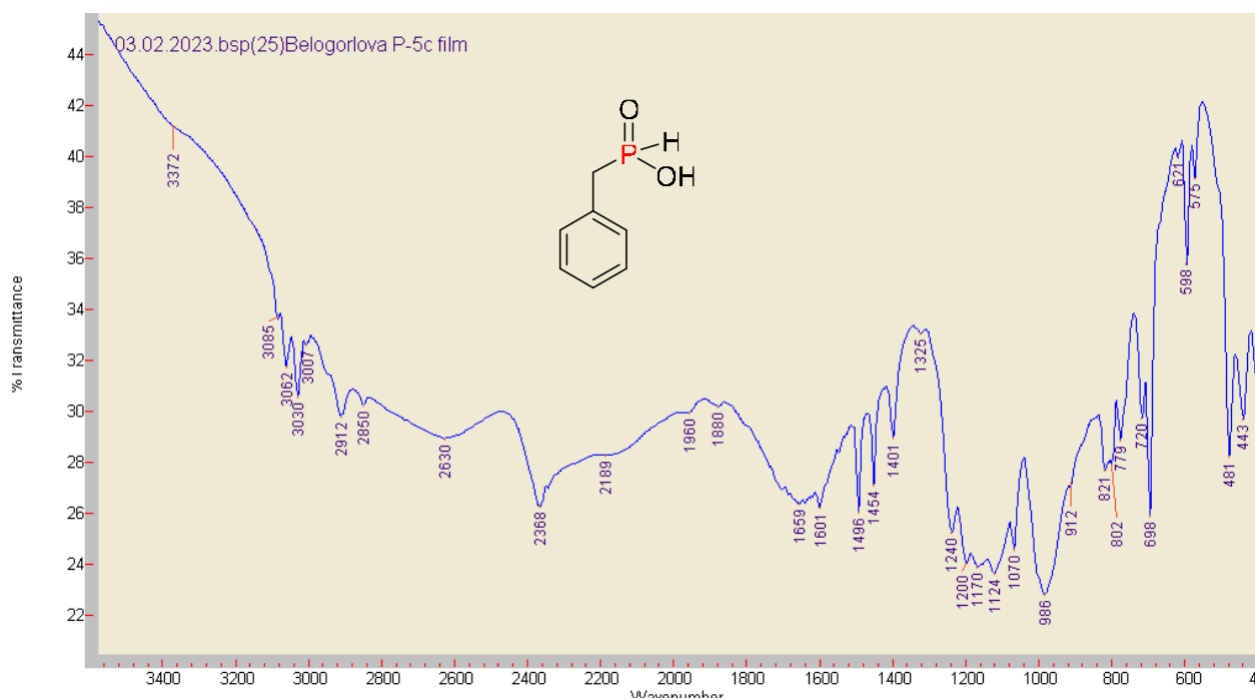

IR spectrum of compound 2a (film,  $\text{cm}^{-1}$ )

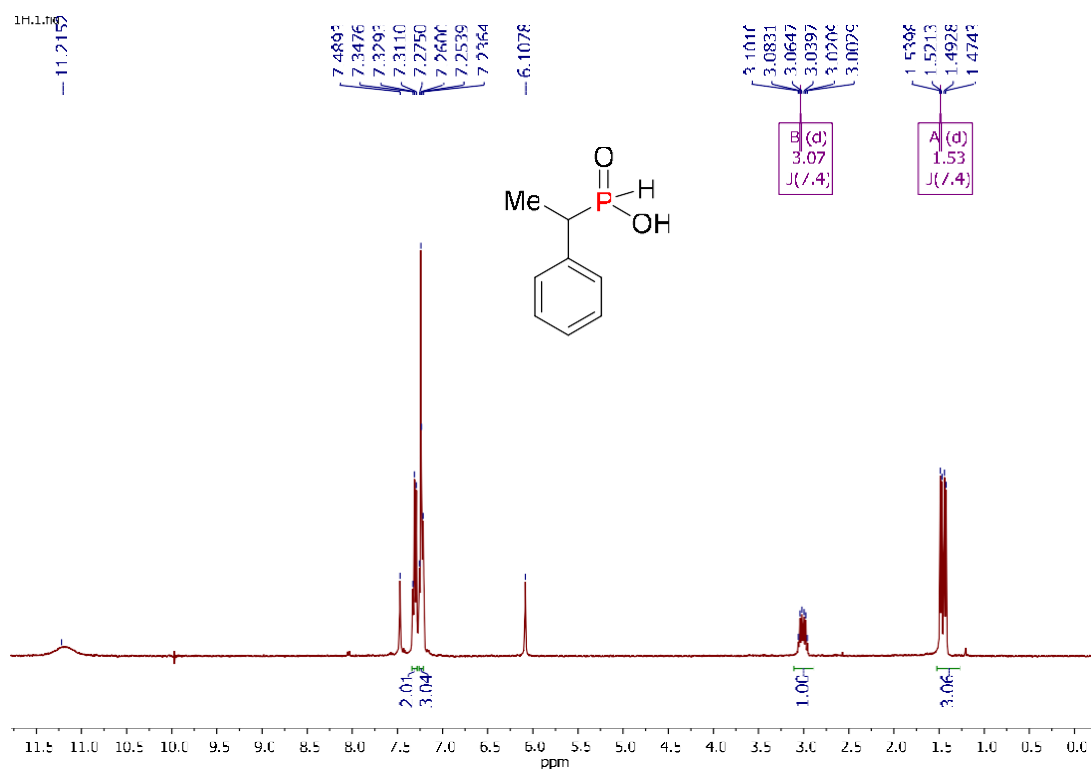

<sup>1</sup>H NMR spectrum of compound **2b** (400.13 MHz, CDCl<sub>3</sub>)

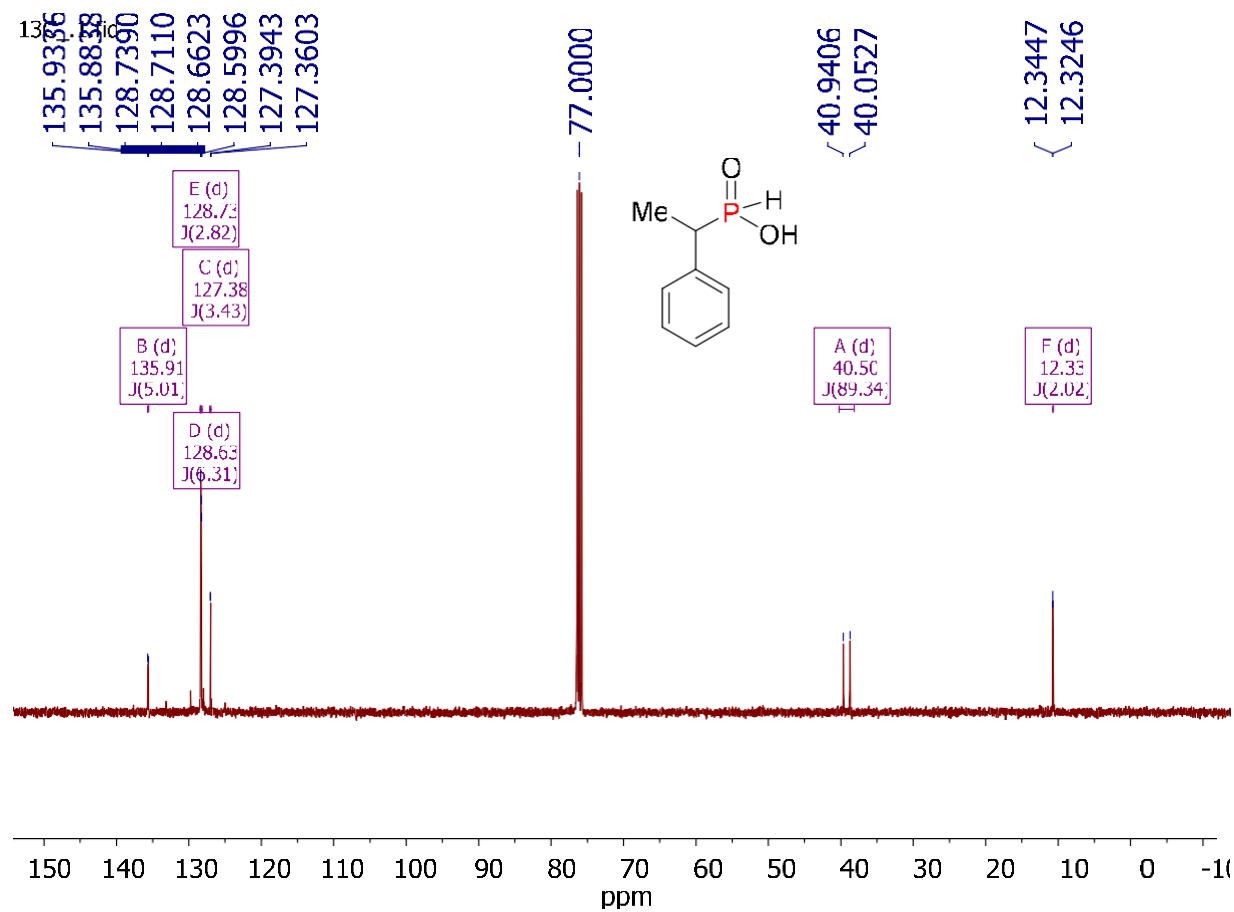

<sup>13</sup>C NMR spectrum of compound **2b** (100.62 MHz, CDCl<sub>3</sub>)



a432-p\_31Pc.1.fid

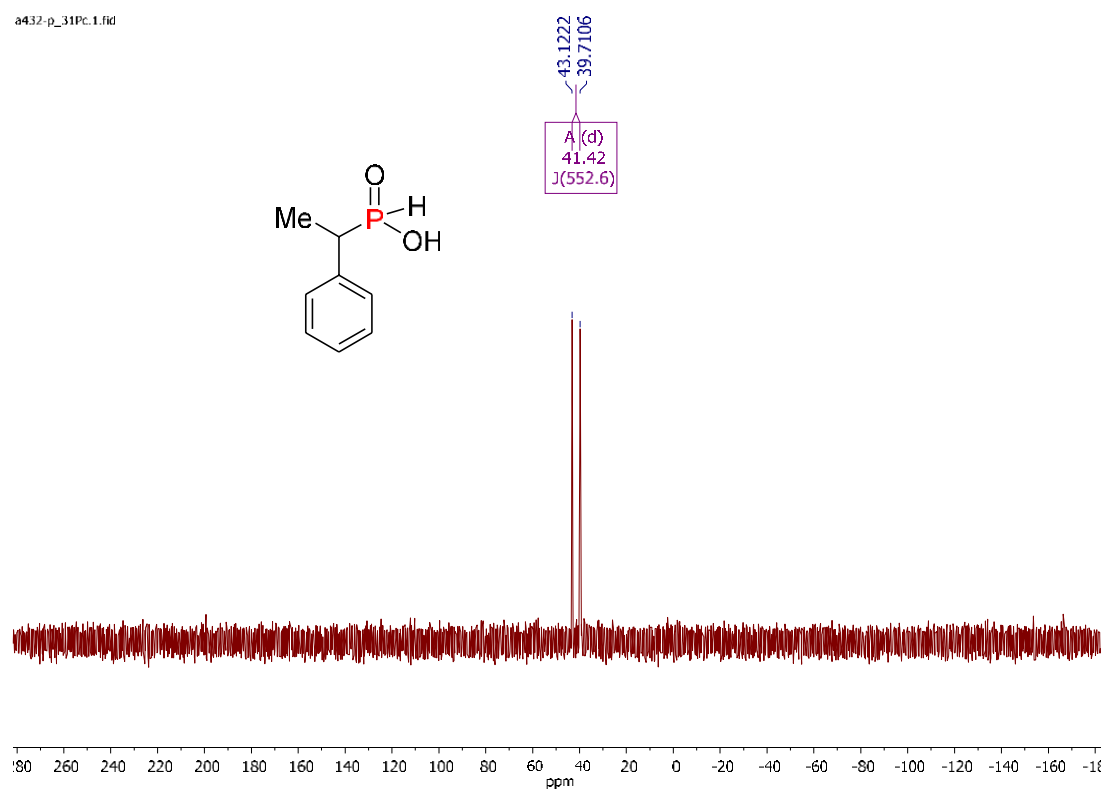

<sup>31</sup>P NMR spectrum of compound **2b** (161.98 MHz, CDCl<sub>3</sub>)

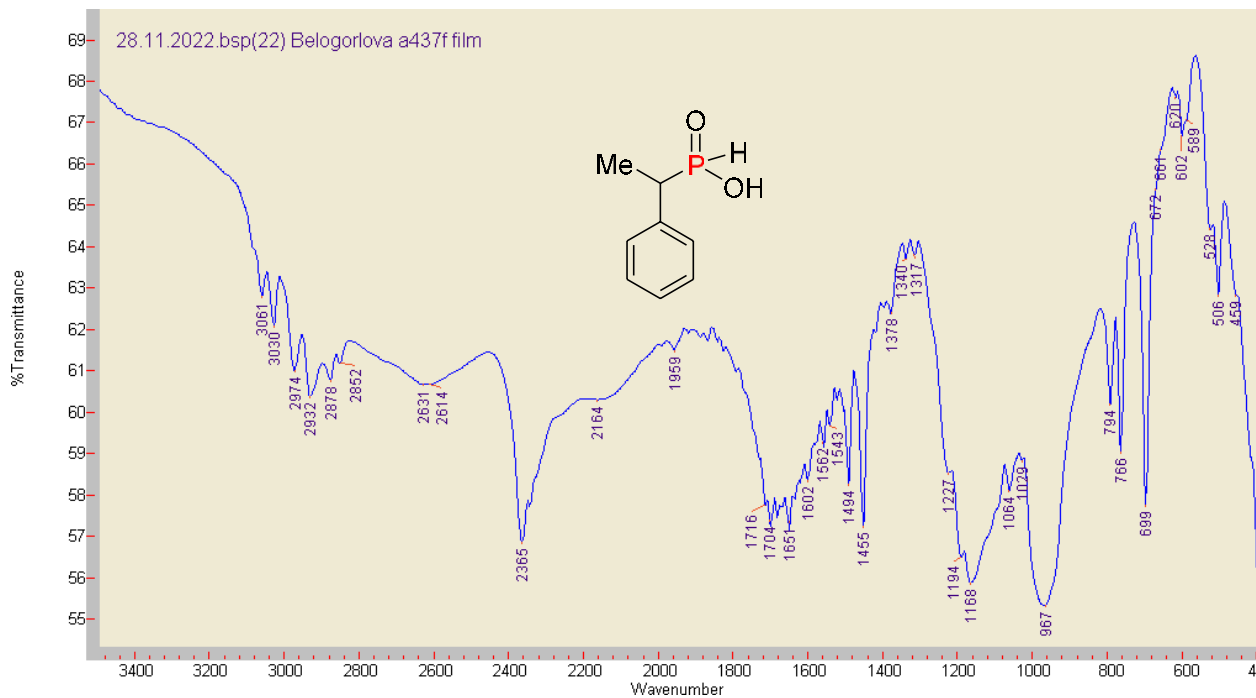

IR spectrum of compound **2b** (film, cm<sup>-1</sup>)

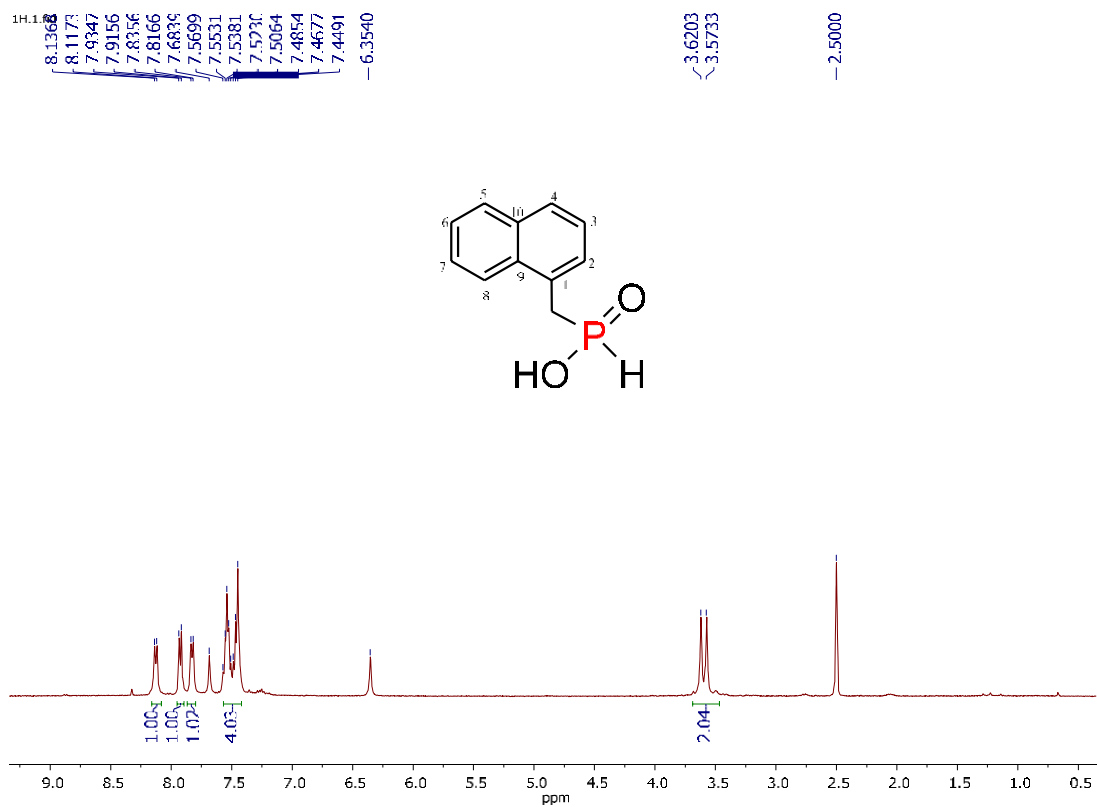

<sup>1</sup>H NMR spectrum of compound **2c** (400.13 MHz, CDCl<sub>3</sub>)

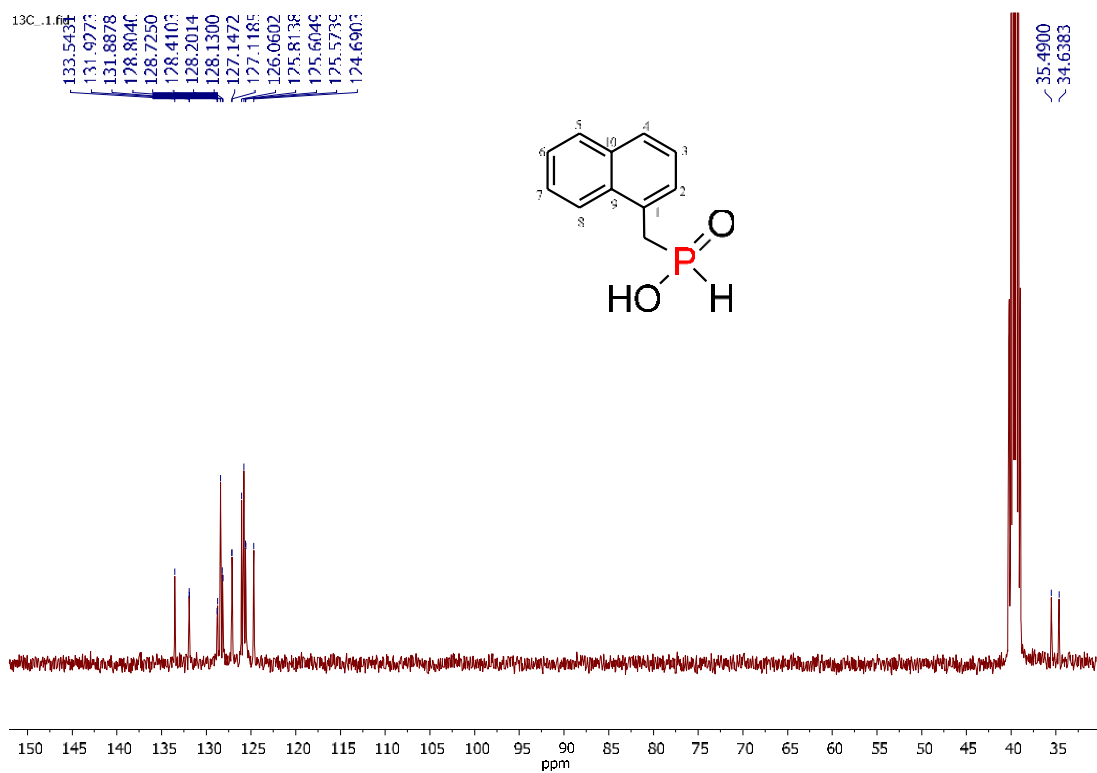

<sup>13</sup>C NMR spectrum of compound **2c** (100.62 MHz, CDCl<sub>3</sub>)

a440-p1\_31Pc.1.fid

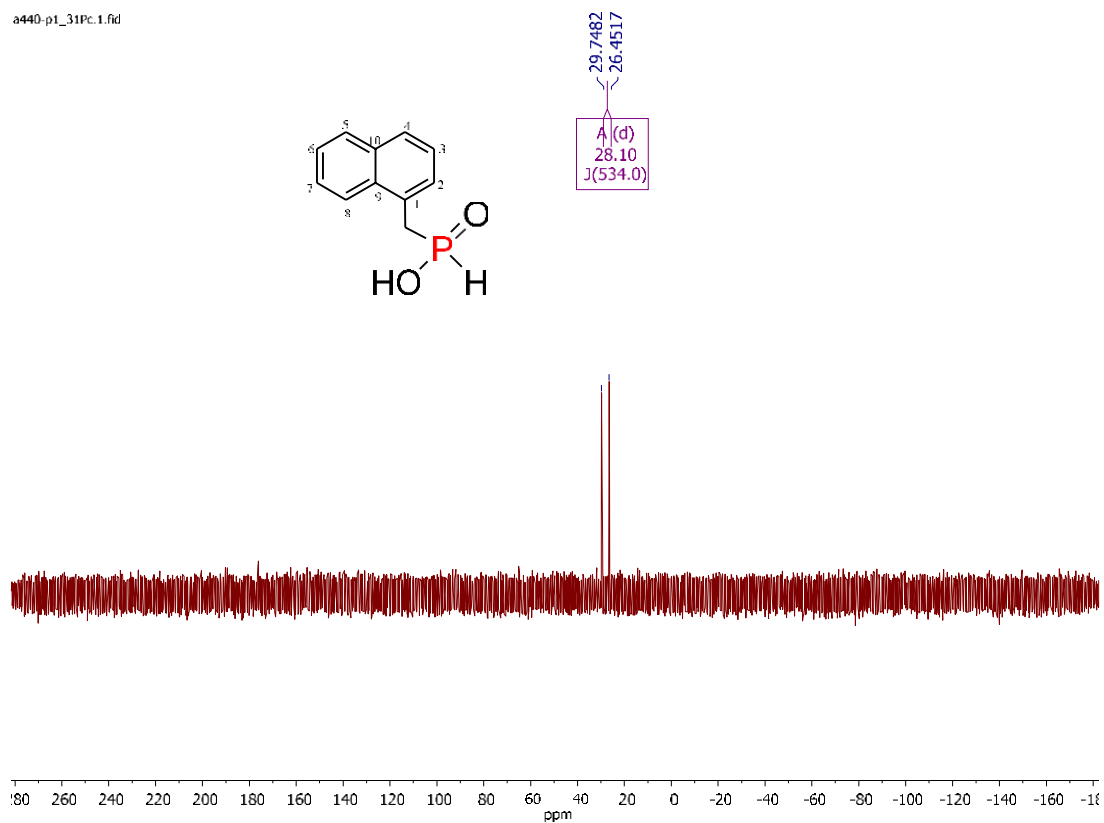

$^{31}\text{P}$  NMR spectrum of compound **2c** (161.98 MHz,  $\text{CDCl}_3$ )

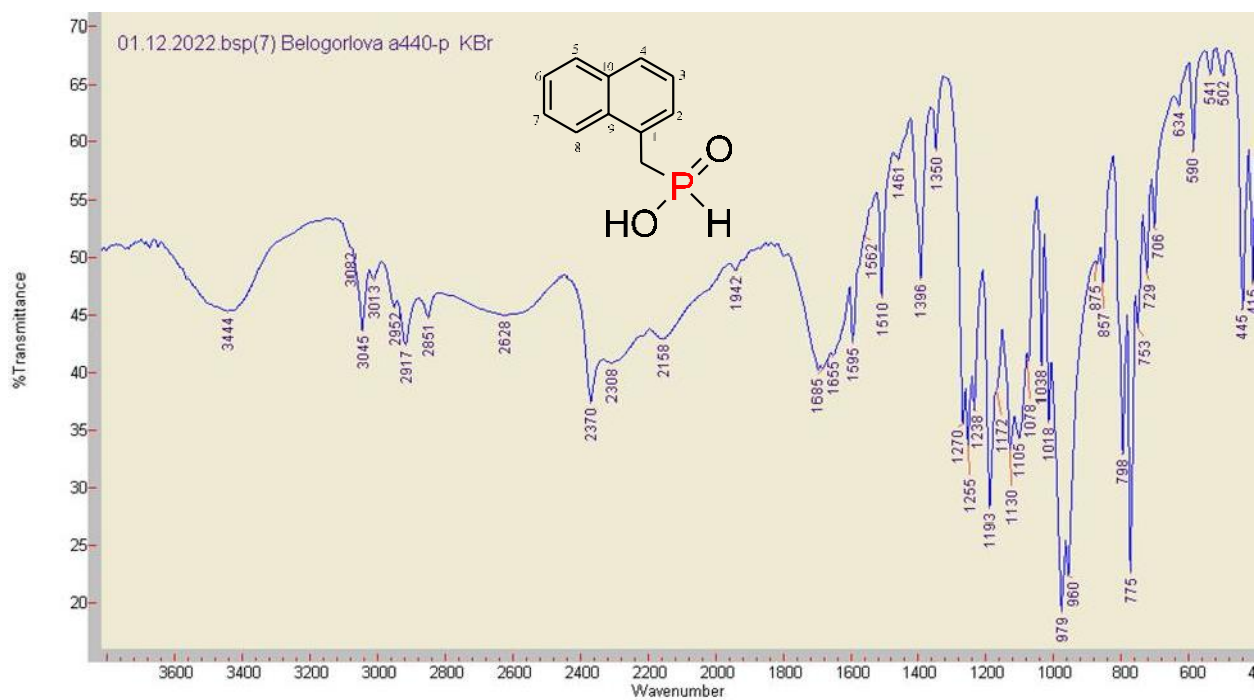

IR spectrum of compound **2c** (KBr,  $\text{cm}^{-1}$ )

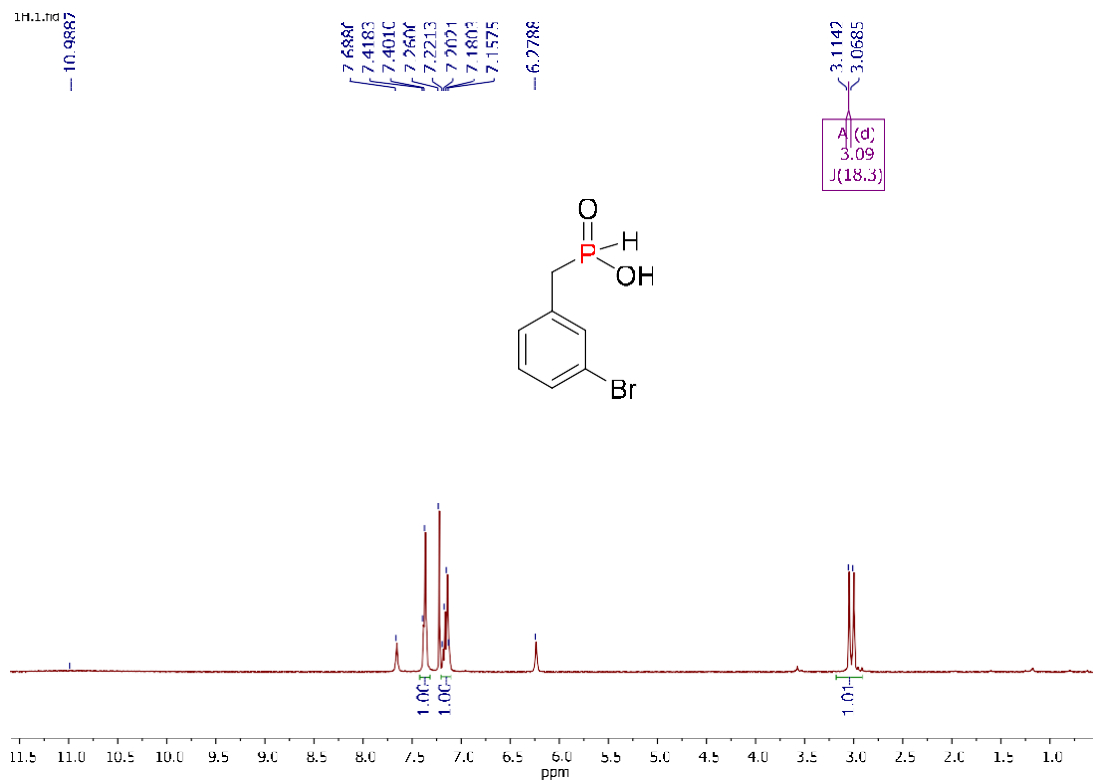

<sup>1</sup>H NMR spectrum of compound **2d** (400.13 MHz, CDCl<sub>3</sub>)

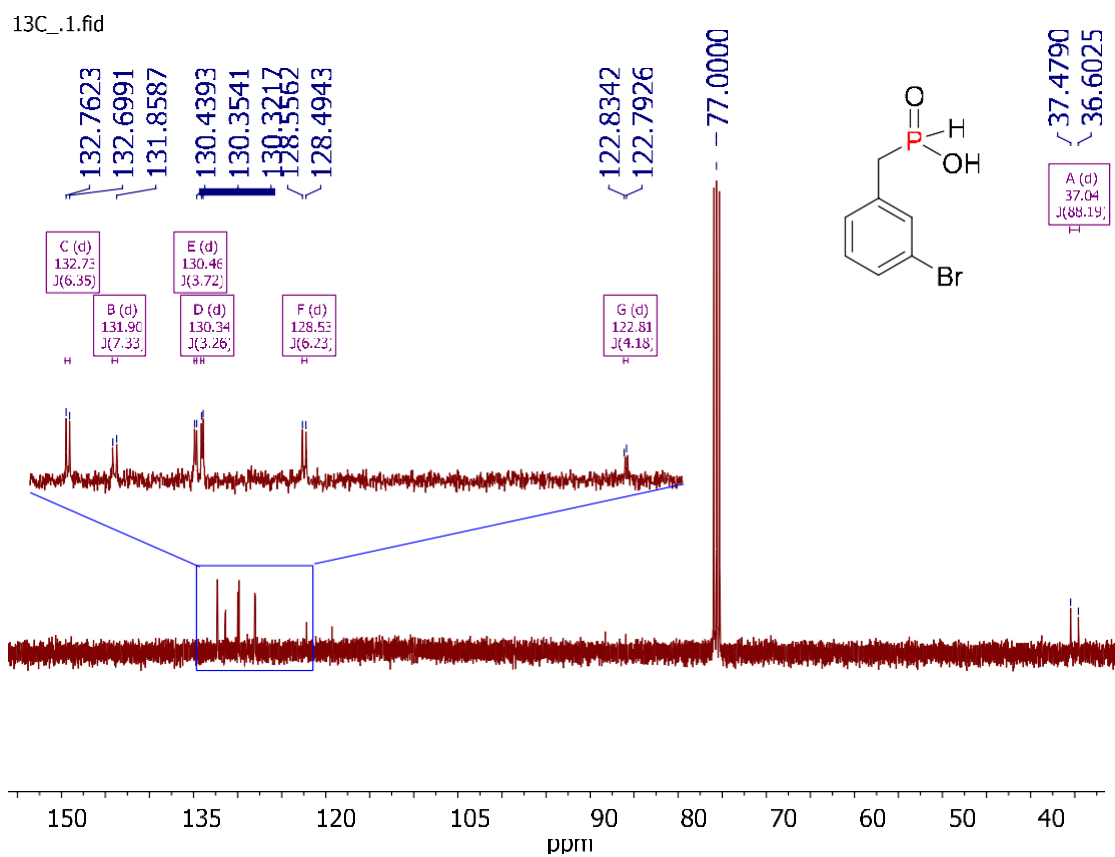

<sup>13</sup>C NMR spectrum of compound **2d** (100.62 MHz, CDCl<sub>3</sub>)

a444-p1\_31Pc.1.fid

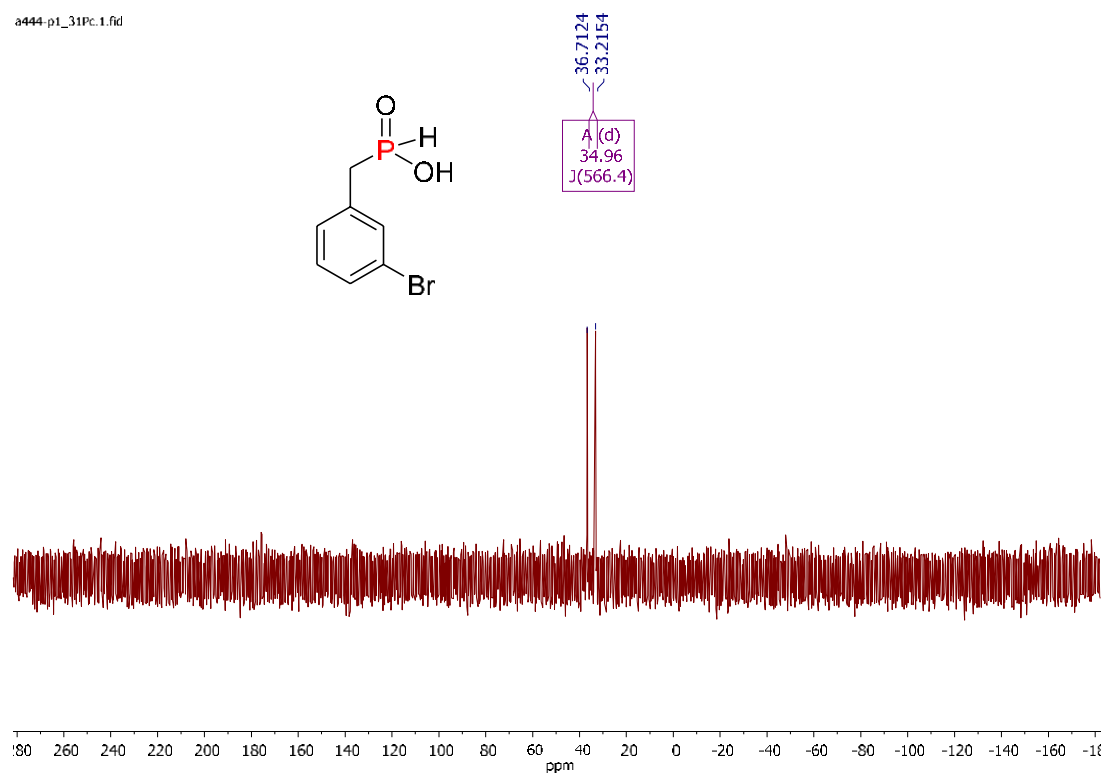

<sup>31</sup>P NMR spectrum of compound **2d** (161.98 MHz, CDCl<sub>3</sub>)

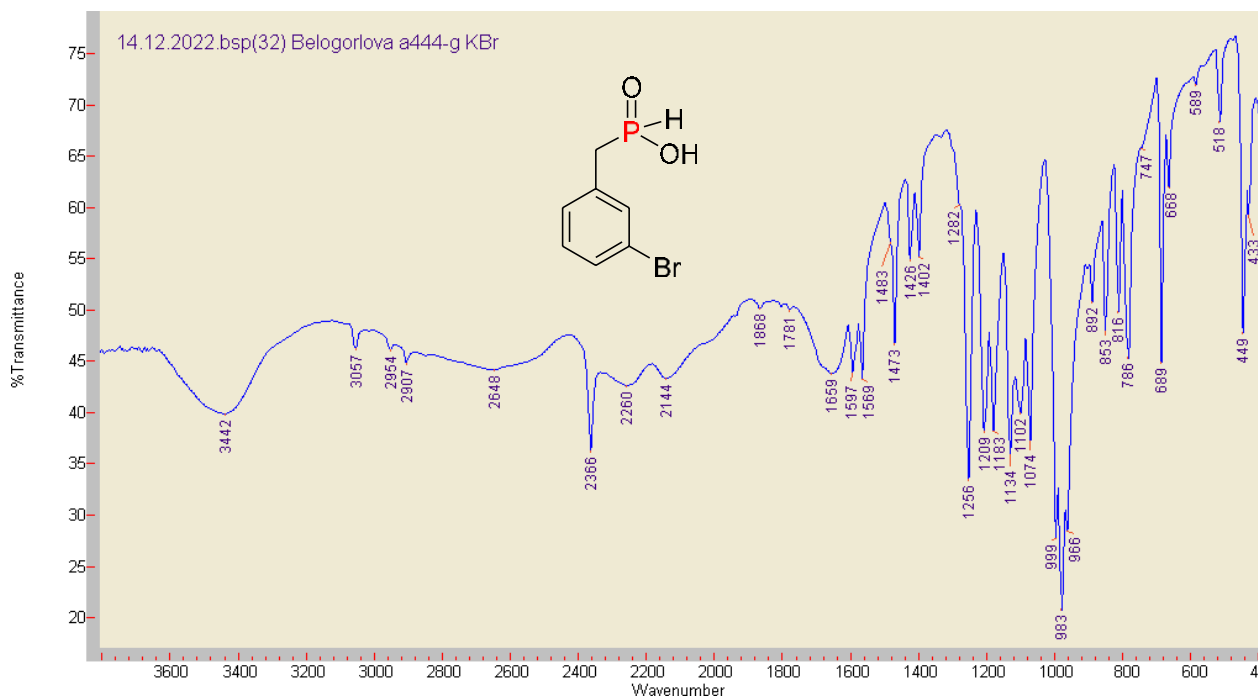

IR spectrum of compound **2d** (KBr, cm<sup>-1</sup>)

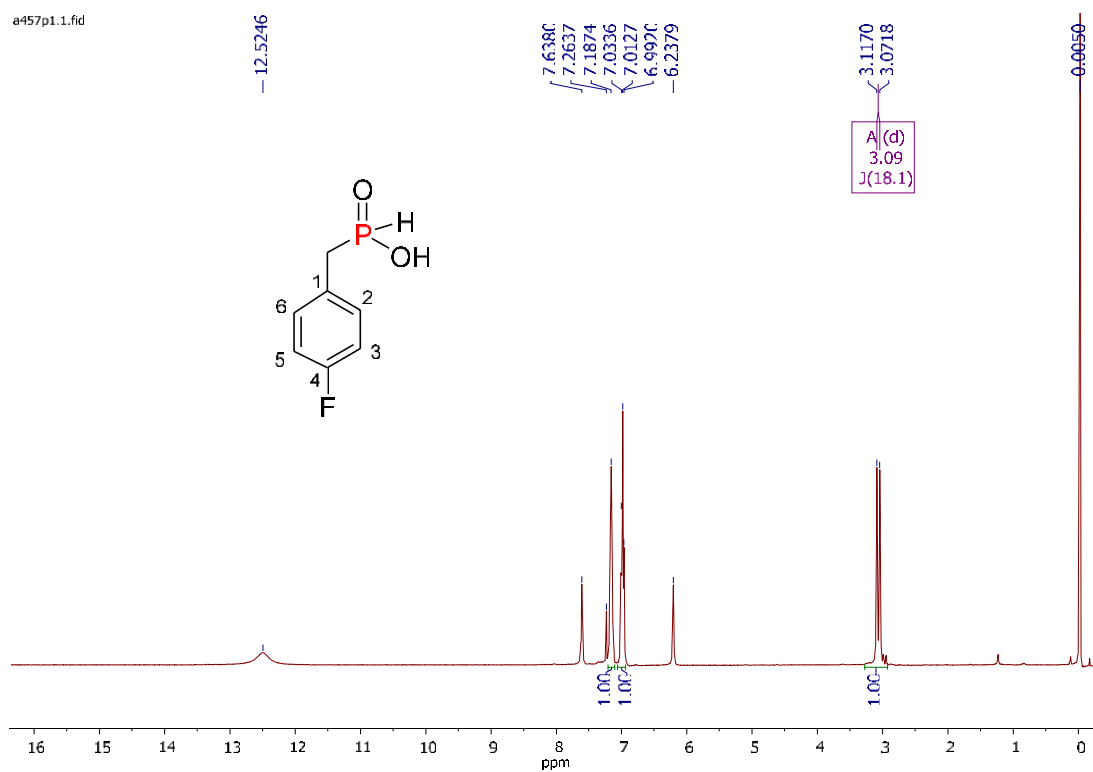

<sup>1</sup>H NMR spectrum of compound **2e** (400.13 MHz, CDCl<sub>3</sub>)

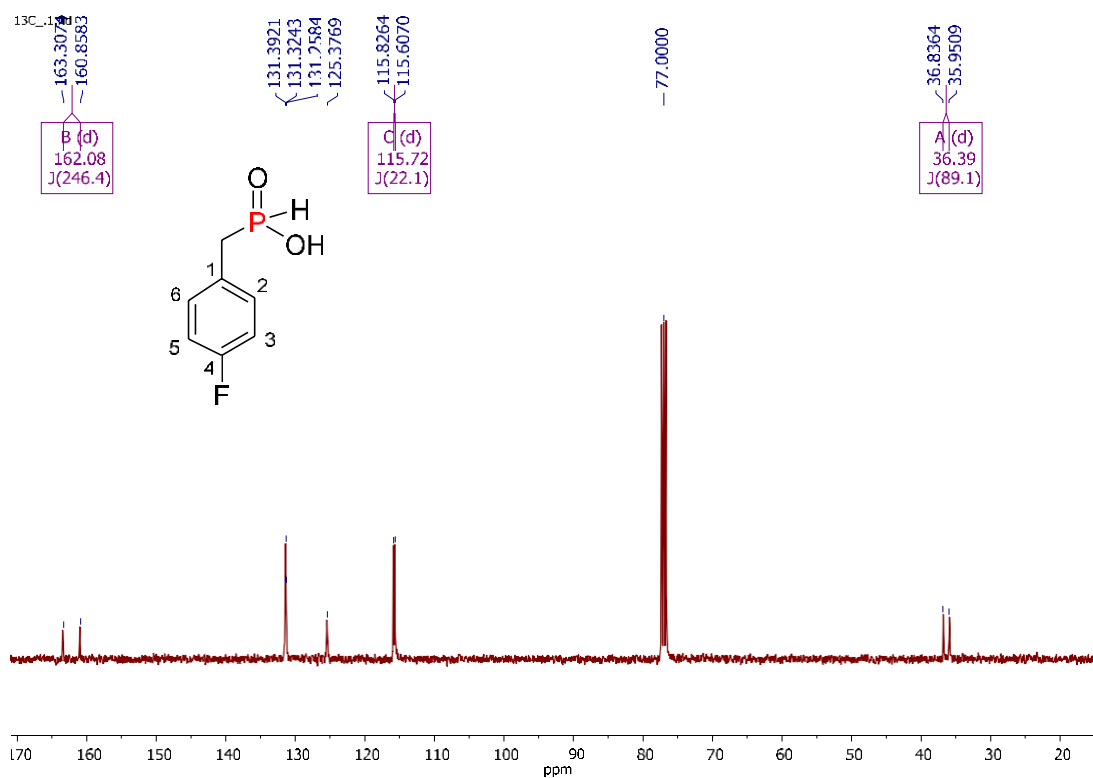

<sup>13</sup>C NMR spectrum of compound **2e** (100.62 MHz, CDCl<sub>3</sub>)

a-457-p\_31Pc.1.fid

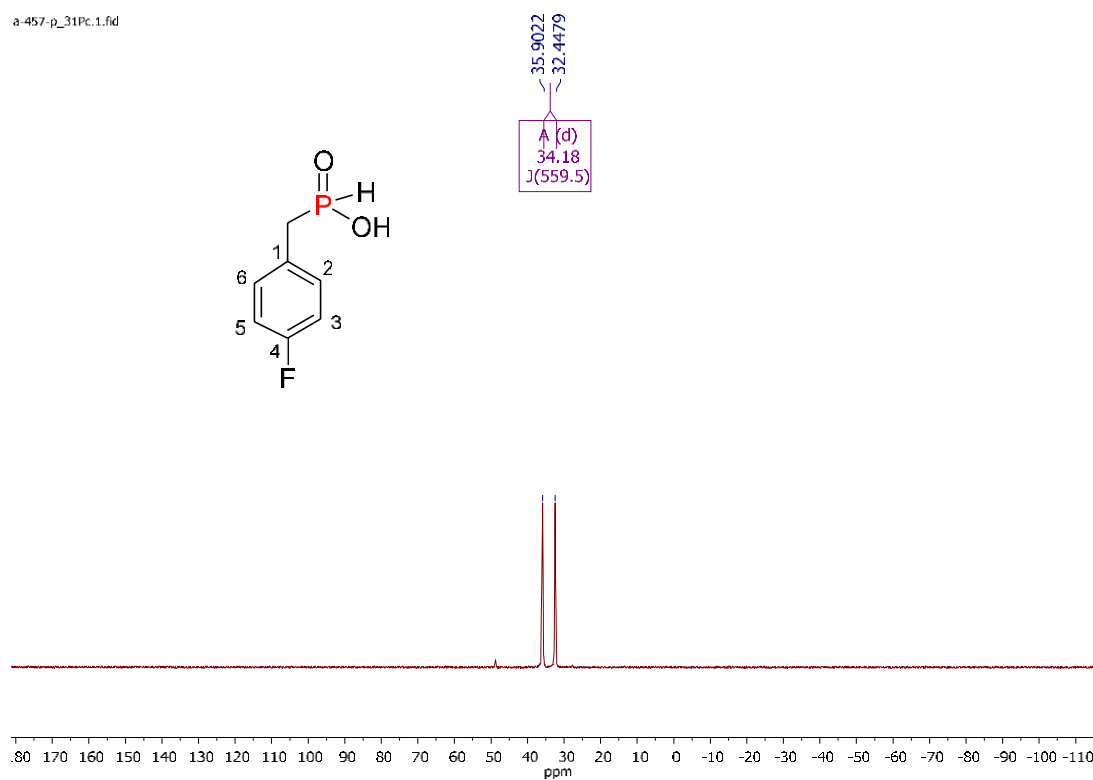

<sup>31</sup>P NMR spectrum of compound **2e** (161.98 MHz, CDCl<sub>3</sub>)

a457p1\_19F.1.fid  
F19

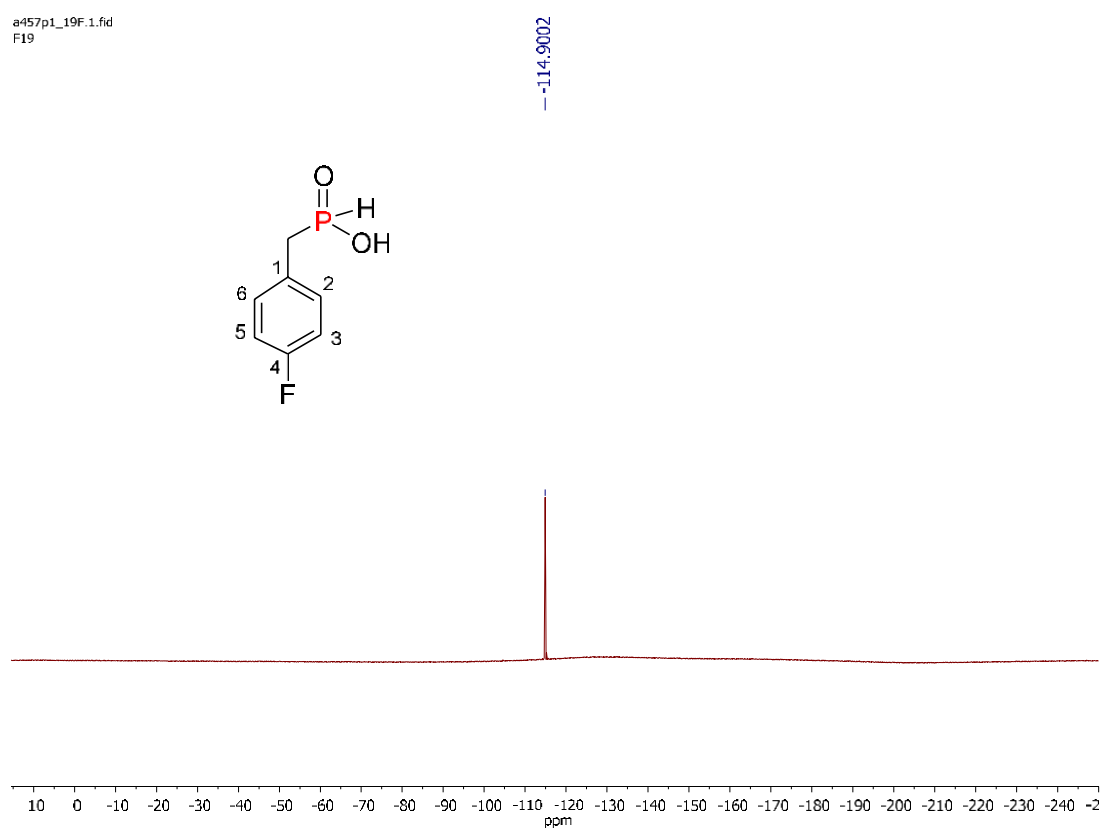

<sup>19</sup>F NMR spectrum of compound **2e** (376.5 MHz, CDCl<sub>3</sub>)

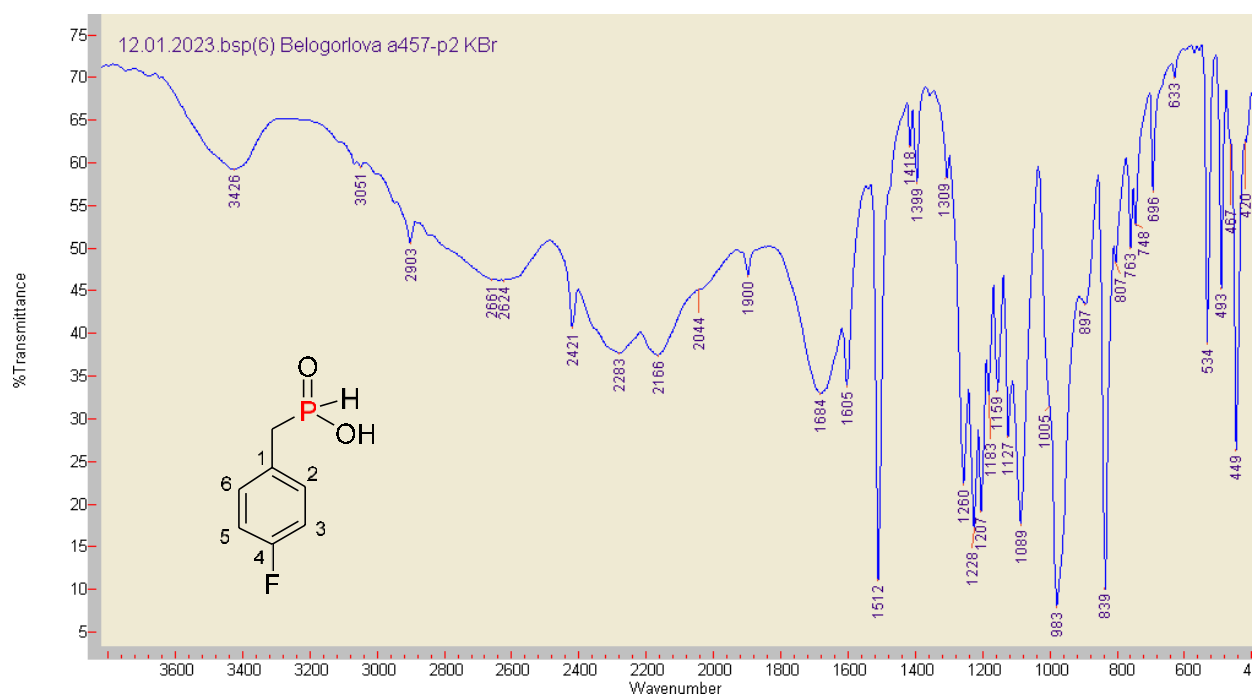

IR spectrum of compound **2e** (KBr, cm<sup>-1</sup>)

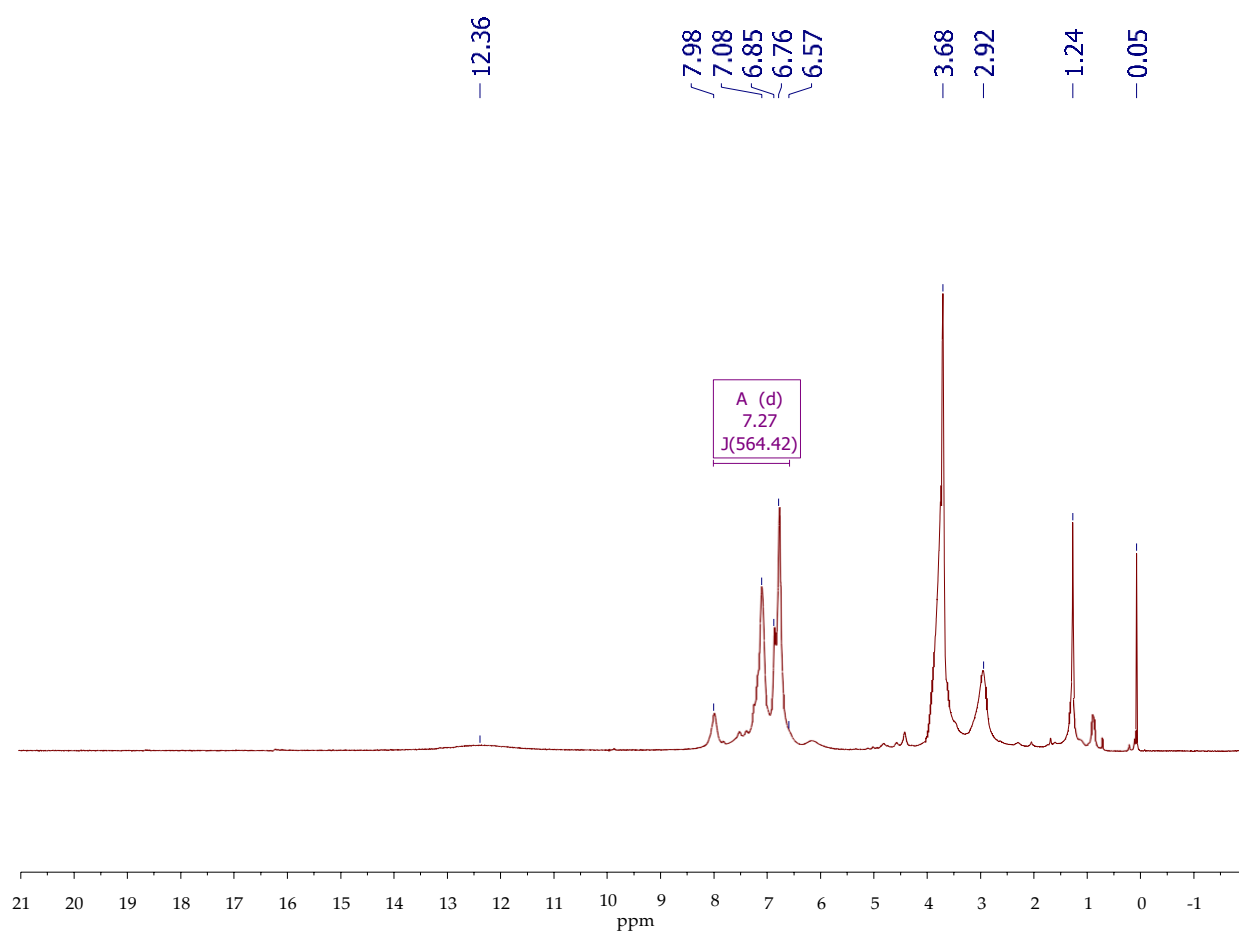

<sup>1</sup>H NMR spectrum of 4-Methoxybenzyl-H-phosphonic acid (400.13 MHz, CDCl<sub>3</sub>)



<sup>31</sup>Pdec

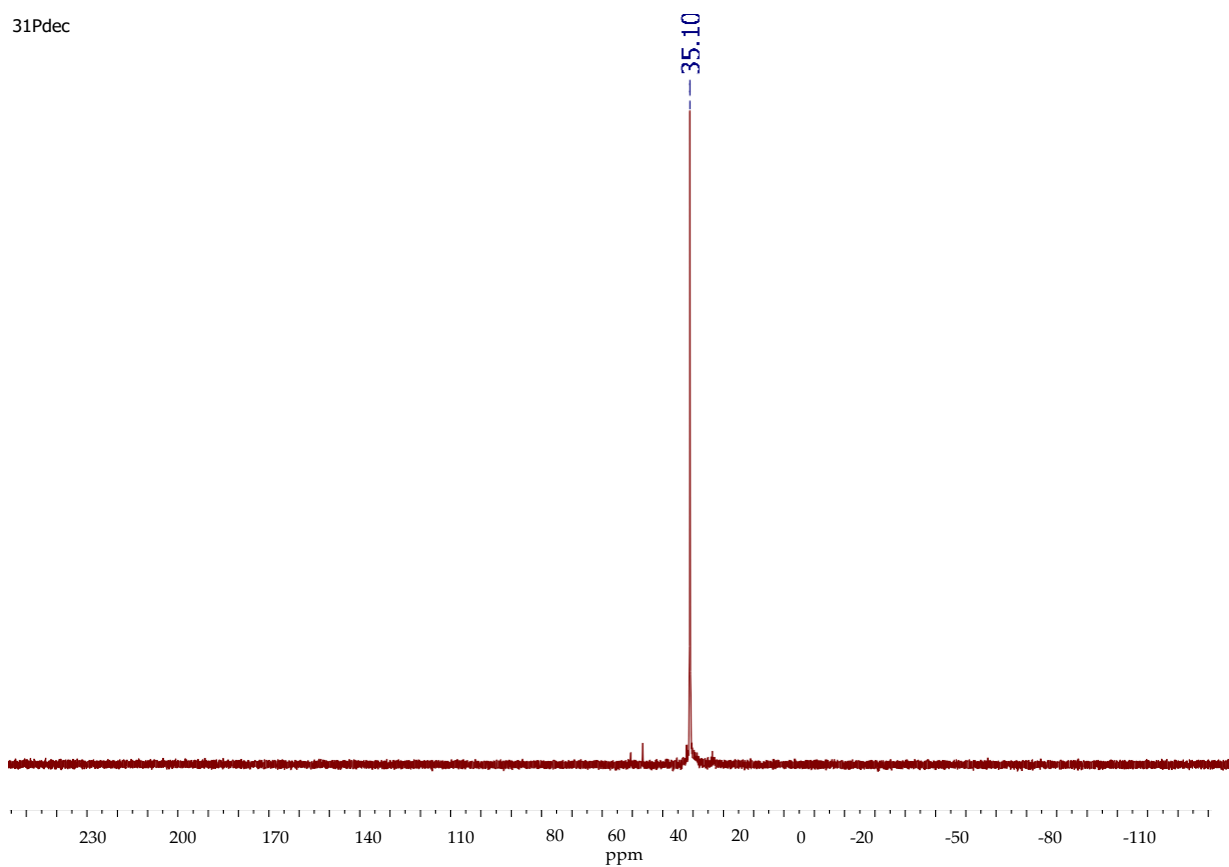

<sup>31</sup>P{H} NMR spectrum of 4-Methoxybenzyl-H-phosphinic acid (161.98 MHz, CDCl<sub>3</sub>)

<sup>31</sup>Pcop

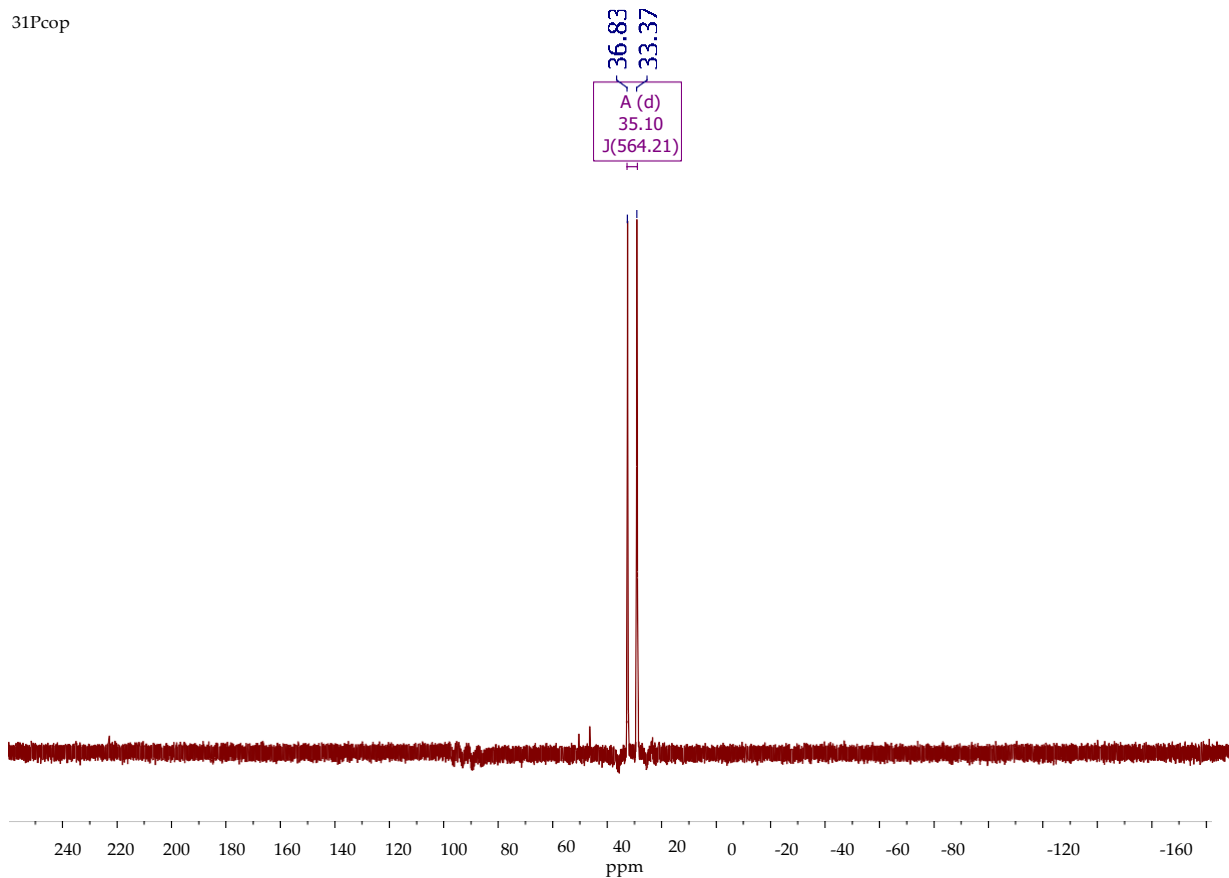

<sup>31</sup>P NMR spectrum of 4-Methoxybenzyl-H-phosphinic acid (161.98 MHz, CDCl<sub>3</sub>)

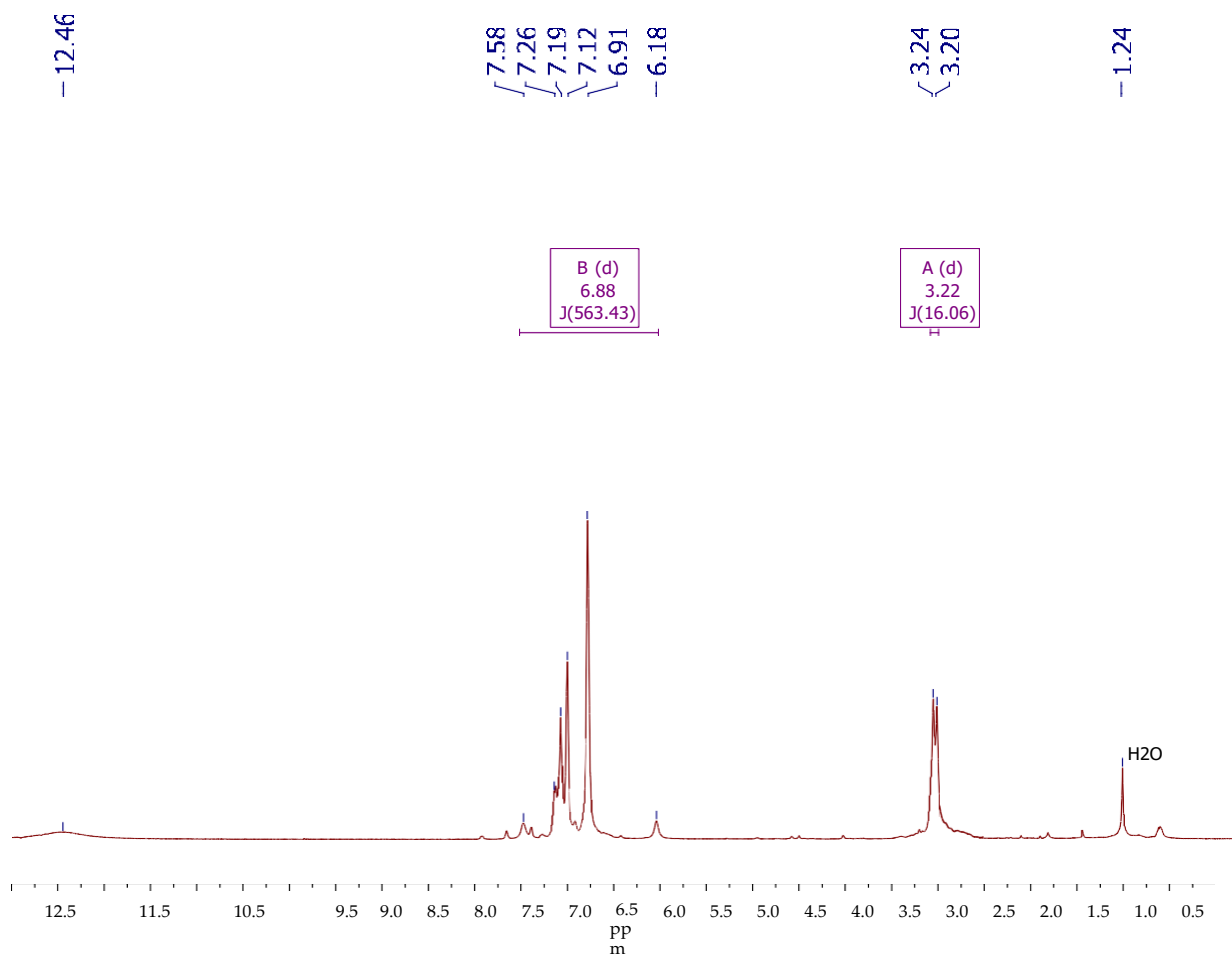

31P dec.1.fid

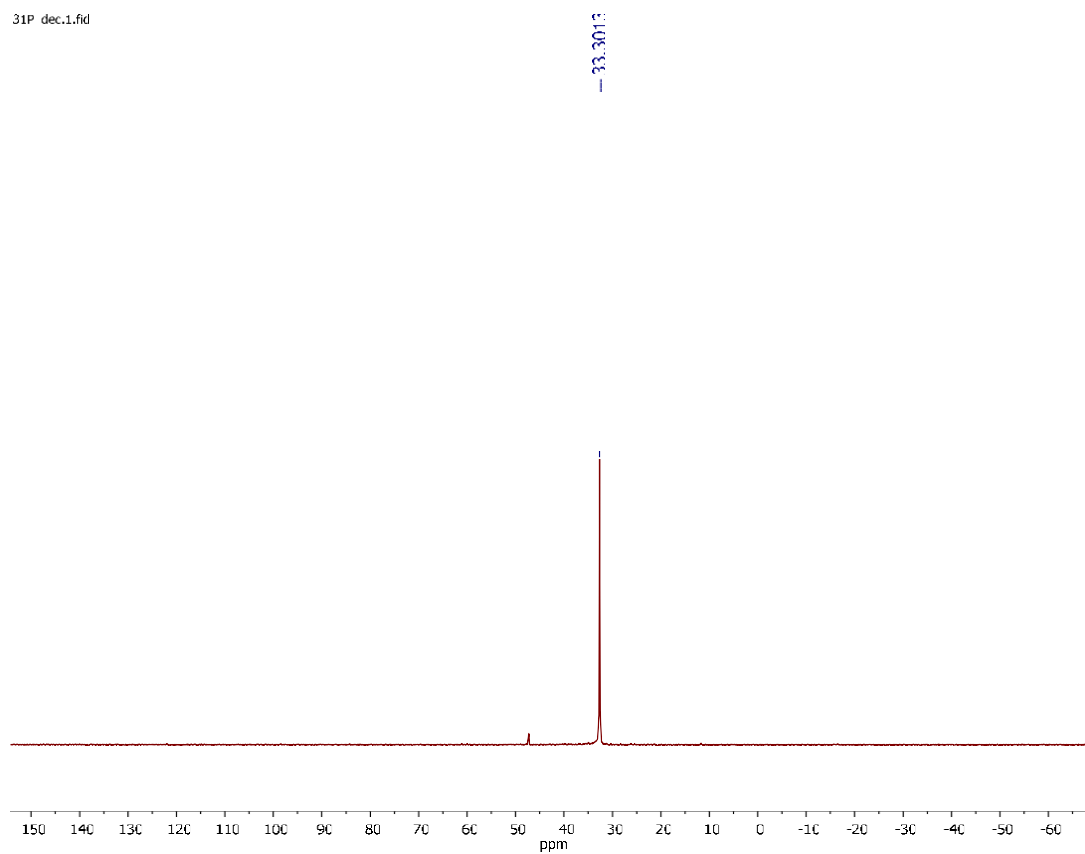

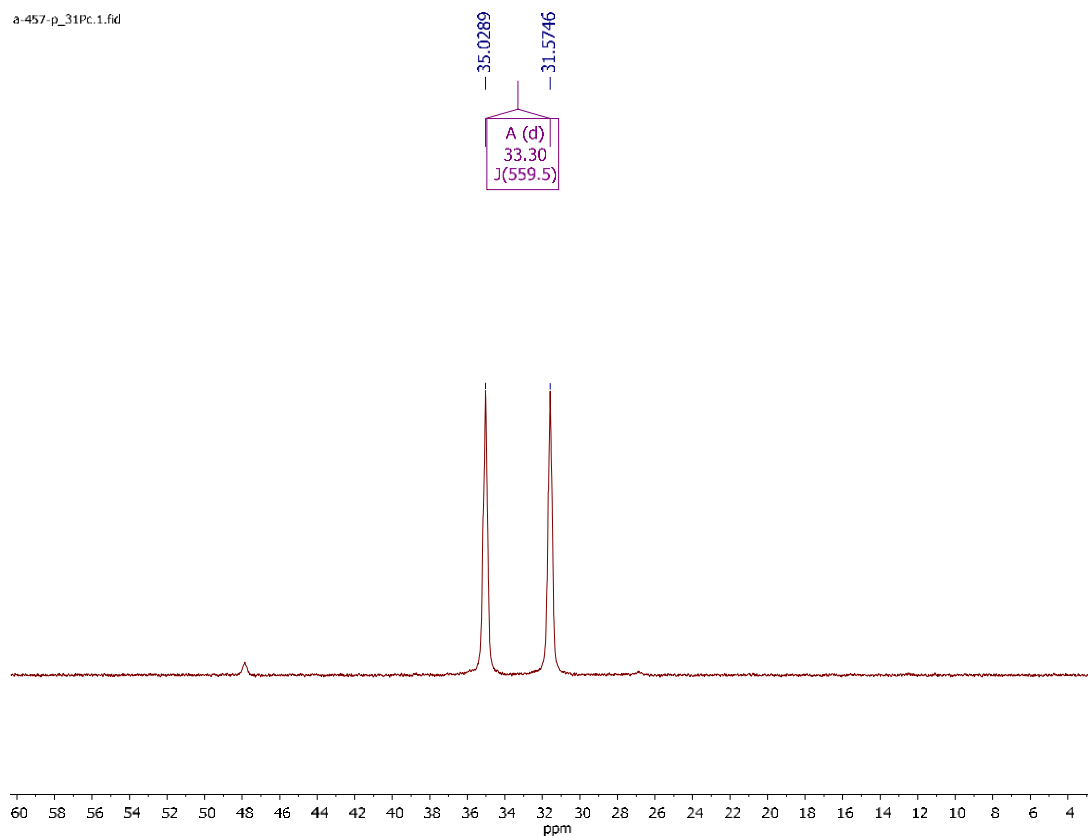

$^{31}\text{P}$  NMR spectrum of 2-Thienylmethyl-H-phosphinic acid (161.98 MHz,  $\text{CDCl}_3$ )

## References

1. Levshina, K.V.; Sergievskaya, S.I. Preparation of N,N-bis(chloroethyl) alkaryl amines. *Zh. Obshch. Khim.* **1954**, 24, 905–909.
2. Karmanova, I. B.; Vol'kenshtein, Yu. B.; Belen'kii, L. I. Alkyl m-chloromethylphenyl ketones, U.S.S.R. Patent, SU585150, 25 December 1977.
3. 2-Chloromethylthiophene. *Organic Syntheses* **1949**, 29, 31. Available online: <https://orgsyn.org/Content/pdfs/procedures/CV3P0197.pdf> (accessed on 7 April 2023)
